# Supplementary material
Source: MDPI journal article supplement (https://www.mdpi.com/1999-4907/12/1/38)

**Supplementary Material for the article “Using GatorEye UAV-Borne LiDAR to Quantify the Spatial and Temporal Effects of a Prescribed Fire on Understory Height and Biomass in a Pine Savanna”**

S.1 Relationship between LiDAR height (m) and field understory biomass ( $\text{Mg ha}^{-1}$ ) between heights measured pre- and post fire (May 2018 and November 2018 respectively) along with respective confidence intervals of their regression

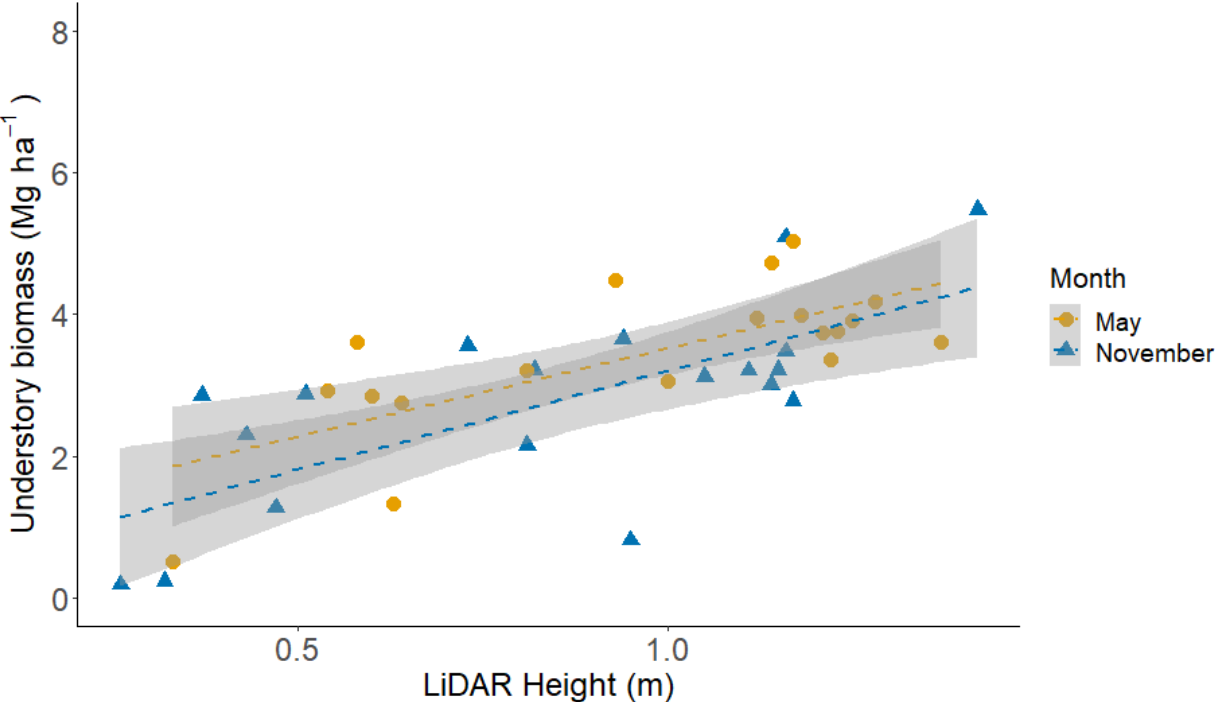

Supplement: s1 [file s1]
